# Supplementary material for: Impact of clinical diagnosis of myocardial infarction in patients with elevated cardiac troponin
Source: HighWire-hosted journal article supplement (doi:10.1136/heartjnl-2022-322298), 2023-05-22
Supplement: heartjnl-2022-322298supp005_data_supplement.pdf [file heartjnl-2022-322298supp005_data_supplement.pdf]

Figure S5 NEW.pdf

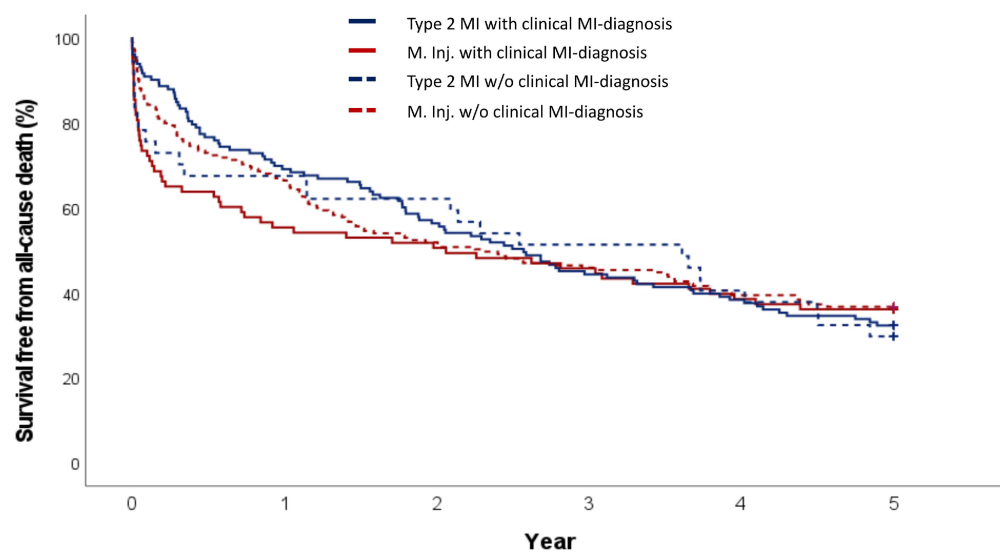

|                | Time 0 | 10 days | 20 days | 30 days | 1 year | 2 years | 3 years | 4 years | 5 years |                     |
|----------------|--------|---------|---------|---------|--------|---------|---------|---------|---------|---------------------|
| Number at risk | 133    | 127     | 124     | 121     | 92     | 75      | 59      | 51      | 43      | Type 2 MI with I.21 |
|                | 83     | 68      | 63      | 61      | 46     | 42      | 38      | 32      | 30      | M. inj. With I.21   |
|                | 37     | 31      | 29      | 29      | 25     | 23      | 19      | 15      | 11      | Type 2 MI w/o I.21  |
|                | 185    | 175     | 163     | 158     | 123    | 96      | 85      | 73      | 68      | M. inj. w/o I.21    |
