# Supplementary figures and images for: Impact of clinical diagnosis of myocardial infarction in patients with elevated cardiac troponin
Source: HighWire-hosted journal article supplement (doi:10.1136/heartjnl-2022-322298), 2023-05-22

Figure S1.pdf

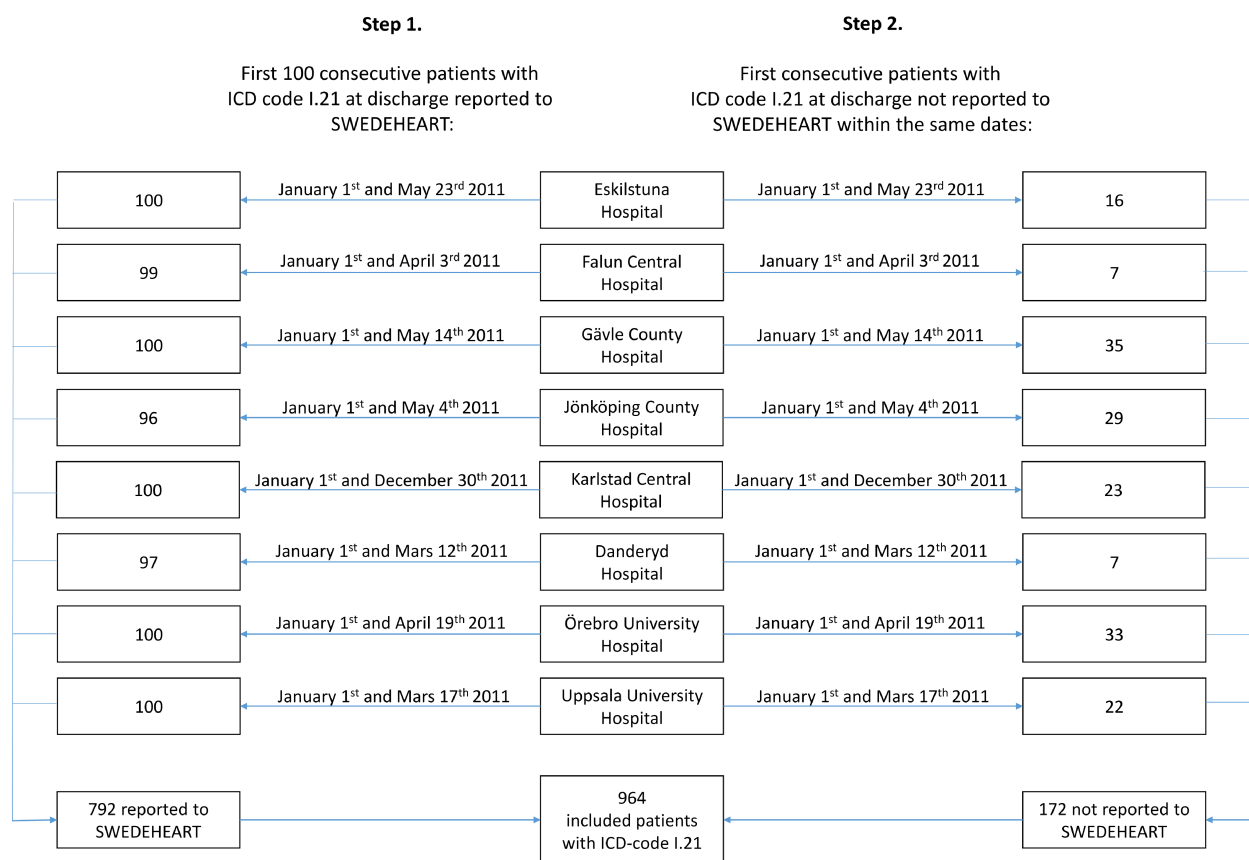

Supplement: heartjnl-2022-322298supp001_data_supplement.pdf [file heartjnl-2022-322298supp001_data_supplement.pdf]

Figure S2.pdf

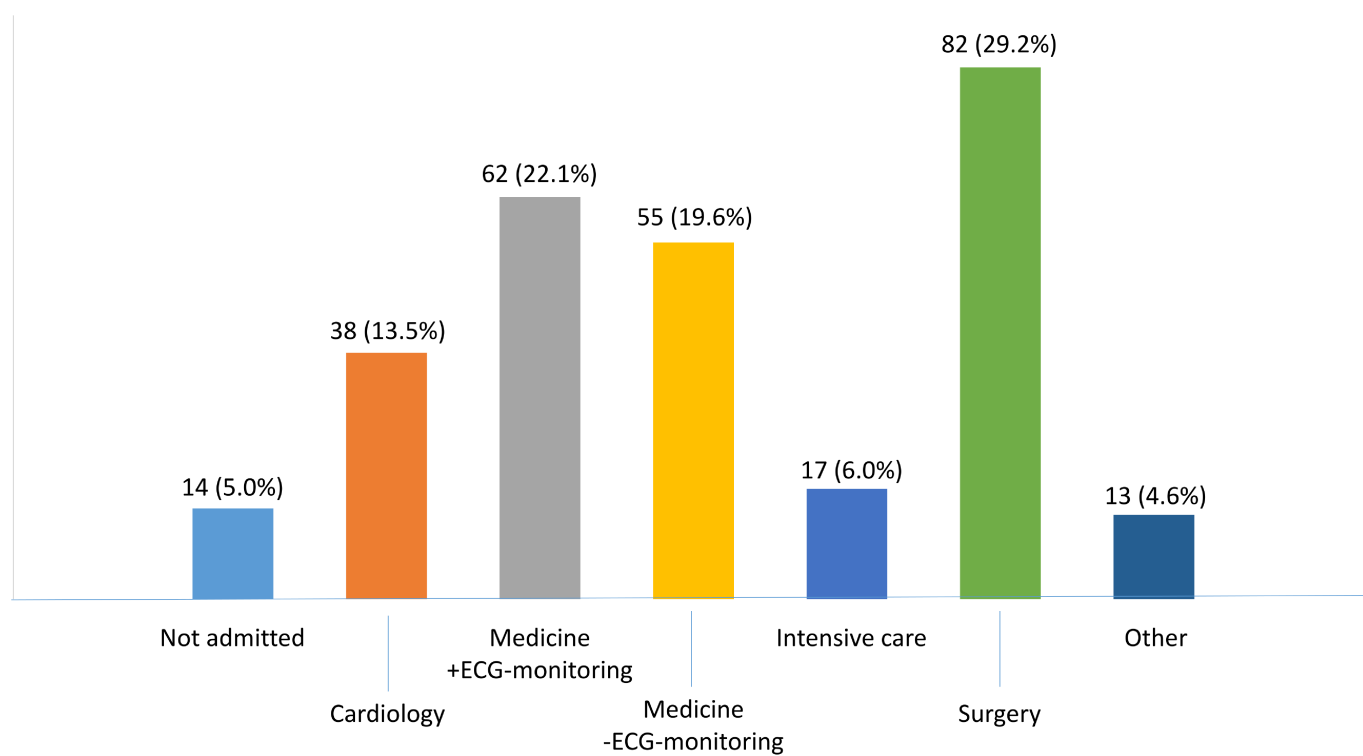

Supplement: heartjnl-2022-322298supp002_data_supplement.pdf [file heartjnl-2022-322298supp002_data_supplement.pdf]

Figure S3.pdf

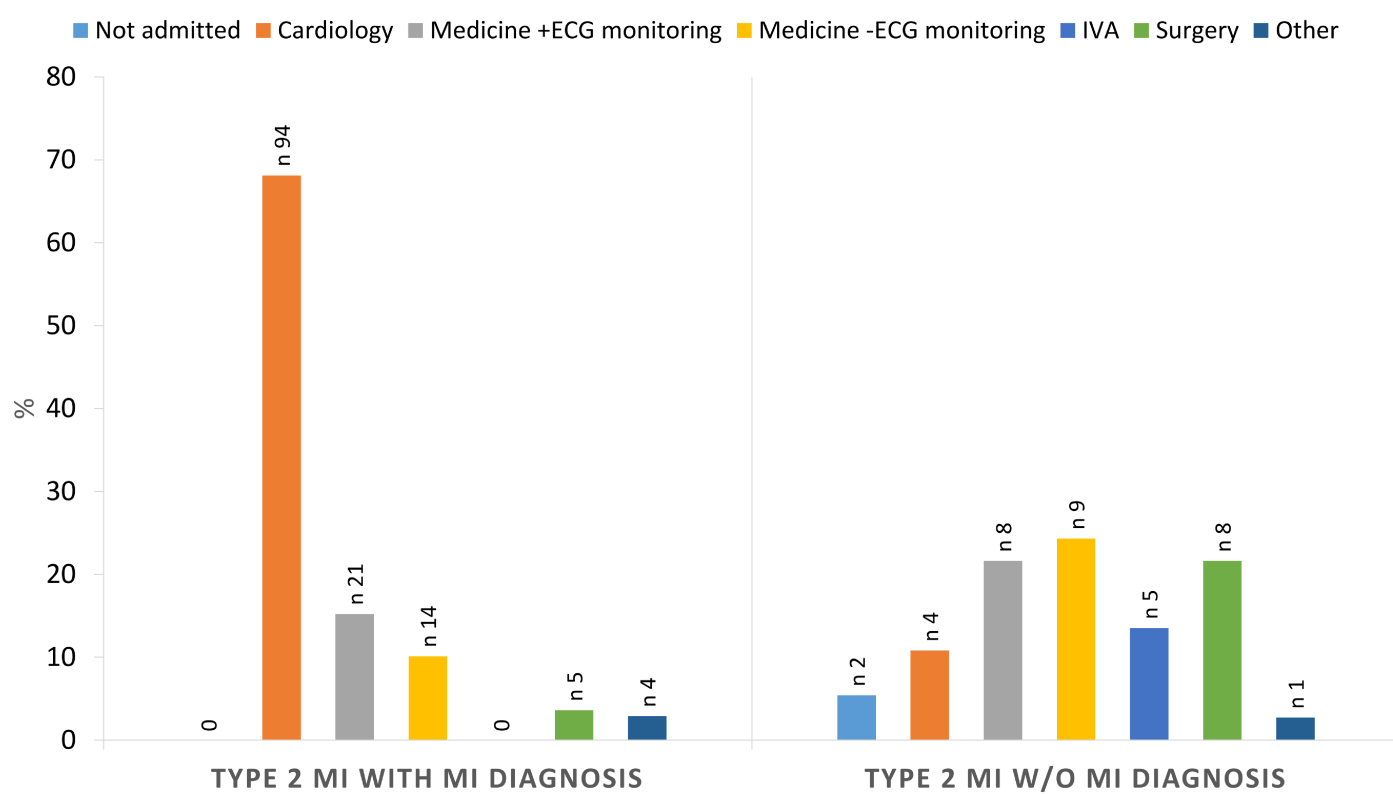

Supplement: heartjnl-2022-322298supp003_data_supplement.pdf [file heartjnl-2022-322298supp003_data_supplement.pdf]

Figure S4.pdf

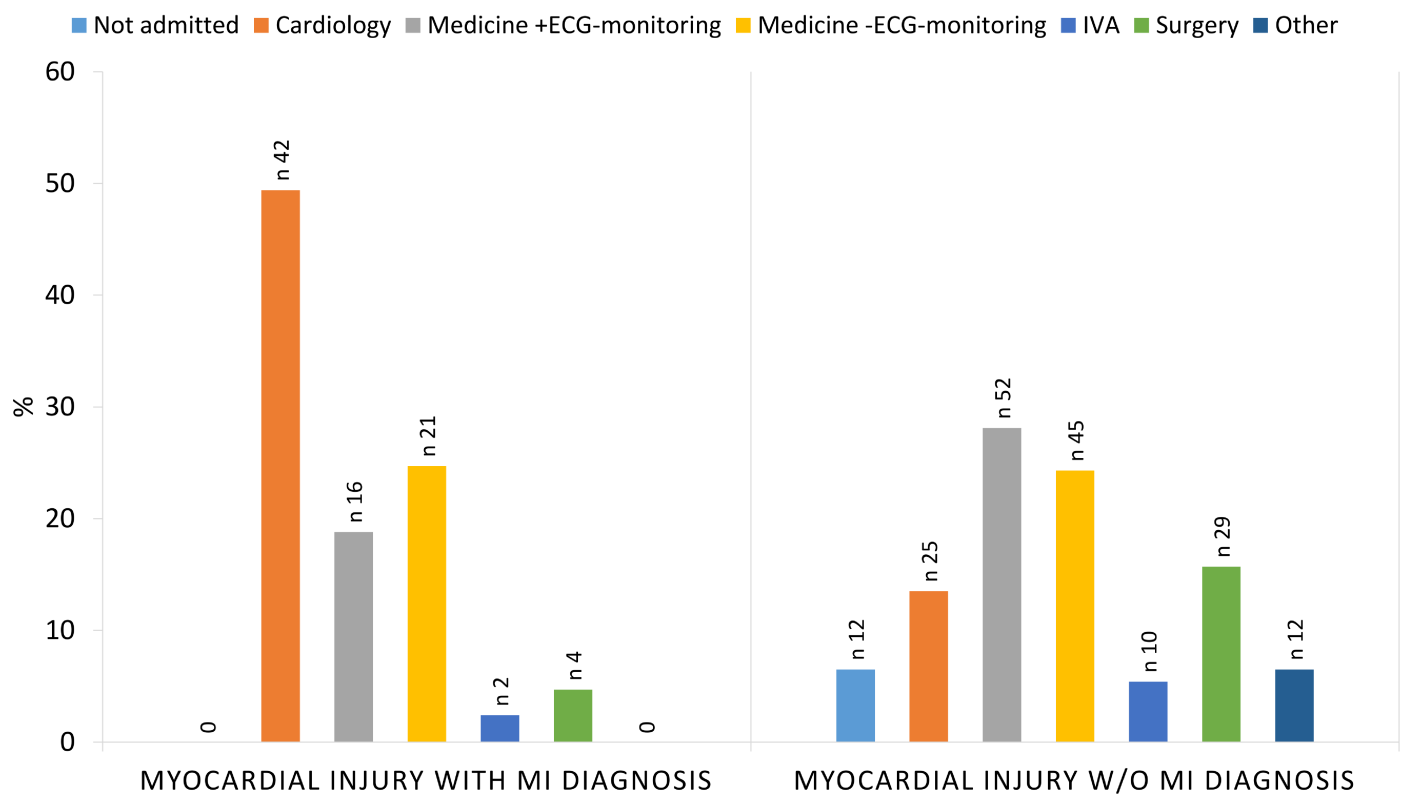

Supplement: heartjnl-2022-322298supp004_data_supplement.pdf [file heartjnl-2022-322298supp004_data_supplement.pdf]
